# Supplementary material
Source: PubMed Central journal article supplement (PMC5018125)
Supplement: mmc1.pdf [file mmc1.pdf]

**Biophysical Journal, Volume 111**

**Supplemental Information**

**The Charge Properties of Phospholipid Nanodiscs**

**Cheng Her, Dana I. Filoti, Mark A. McLean, Stephen G. Sligar, J.B. Alexander Ross, Harmen Steele, and Thomas M. Laue**

## THE CHARGE PROPERTIES OF PHOSPHOLIPID NANODISCS

Cheng Her,\* Dana I. Filoti,\* Mark A. McLean,<sup>†</sup> Stephen G. Sligar,<sup>†</sup> J.B. Alexander Ross<sup>‡</sup>,  
Harmen Steele<sup>‡</sup> and Thomas M. Laue\*

\*Department of Molecular, Cellular and Biomedical Sciences, University of New Hampshire,  
Durham NH, USA; <sup>†</sup>Department of Biochemistry, University of Illinois at Urbana-Champaign,  
Champaign IL, US; <sup>‡</sup>Department of Chemistry and Biochemistry, University of Montana,  
Missoula MT, USA

## Supporting Materials

**Table S1**  
Hydrodynamic properties of lipid Nanodiscs

| Nanodisc                             | $M_b$ (kDa) | $S_{20,w}^a$                               | $R_s$ (nm)                   | $\bar{v}$ (cm <sup>3</sup> /g)             |
|--------------------------------------|-------------|--------------------------------------------|------------------------------|--------------------------------------------|
| MSP1D1 POPC                          | 14.3 ± 0.4  | 3.0 <sub>52</sub> ± 5.0 × 10 <sup>-3</sup> | 4.7 ± 5.0 × 10 <sup>-2</sup> | 0.88 <sub>8</sub> ± 3.0 × 10 <sup>-3</sup> |
| MSP1D1 10% POPS                      | 15.5 ± 0.4  | 3.1 <sub>27</sub> ± 5.0 × 10 <sup>-3</sup> | 4.9 ± 3.0 × 10 <sup>-2</sup> | 0.89 <sub>2</sub> ± 4.0 × 10 <sup>-3</sup> |
| MSP1D1 30% POPS                      | 17.8 ± 0.6  | 3.5 <sub>09</sub> ± 3.0 × 10 <sup>-3</sup> | 5.0 ± 5.0 × 10 <sup>-2</sup> | 0.87 <sub>9</sub> ± 4.0 × 10 <sup>-3</sup> |
| MSP1D1 70% POPS                      | 21.6 ± 0.7  | 4.4 <sub>27</sub> ± 5.0 × 10 <sup>-3</sup> | 4.8 ± 4.0 × 10 <sup>-2</sup> | 0.88 <sub>6</sub> ± 3.0 × 10 <sup>-3</sup> |
| MSP1E3D1 POPC                        | 16.8 ± 1.2  | 2.9 <sub>37</sub> ± 4.0 × 10 <sup>-3</sup> | 5.7 ± 8.0 × 10 <sup>-2</sup> | 0.89 <sub>9</sub> ± 3.0 × 10 <sup>-3</sup> |
| MSP1E3D1 10% POPS                    | 19.0 ± 0.6  | 3.2 <sub>59</sub> ± 2.0 × 10 <sup>-3</sup> | 5.8 ± 1.0 × 10 <sup>-1</sup> | 0.88 <sub>9</sub> ± 2.0 × 10 <sup>-2</sup> |
| MSP1E3D1 30% POPS                    | 20.6 ± 0.6  | 3.6 <sub>21</sub> ± 4.0 × 10 <sup>-3</sup> | 5.7 ± 6.0 × 10 <sup>-2</sup> | 0.89 <sub>1</sub> ± 4.0 × 10 <sup>-3</sup> |
| MSP1E3D1 70% POPS                    | 26.7 ± 1.1  | 4.6 <sub>41</sub> ± 3.0 × 10 <sup>-3</sup> | 5.7 ± 1.0 × 10 <sup>-1</sup> | 0.88 <sub>9</sub> ± 3.0 × 10 <sup>-3</sup> |
| MSP1D1 10% POPA                      | 14.6 ± 0.8  | 3.0 <sub>22</sub> ± 3.0 × 10 <sup>-3</sup> | 4.8 ± 6.0 × 10 <sup>-2</sup> | 0.89 <sub>1</sub> ± 4.0 × 10 <sup>-3</sup> |
| MSP1D1 30% POPA                      | 15.7 ± 0.8  | 3.1 <sub>76</sub> ± 6.0 × 10 <sup>-3</sup> | 4.9 ± 6.0 × 10 <sup>-2</sup> | 0.88 <sub>9</sub> ± 4.0 × 10 <sup>-3</sup> |
| MSP1D1 70% POPA                      | 18.5 ± 1.0  | 3.5 <sub>95</sub> ± 8.0 × 10 <sup>-3</sup> | 5.1 ± 1.1 × 10 <sup>-1</sup> | 0.88 <sub>9</sub> ± 3.0 × 10 <sup>-3</sup> |
| MSP1D1 10% POPE                      | 14.6 ± 0.6  | 3.0 <sub>31</sub> ± 4.0 × 10 <sup>-3</sup> | 4.8 ± 4.0 × 10 <sup>-2</sup> | 0.88 <sub>9</sub> ± 2.0 × 10 <sup>-3</sup> |
| MSP1D1 10% PIP <sub>2</sub>          | -           | -                                          | -                            | -                                          |
| MSP1D1 Cardiolipin                   | -           | -                                          | -                            | -                                          |
| MSP1D1 <i>E. coli</i> <sup>b</sup>   | -           | 3.2 <sub>87</sub> ± 5.0 × 10 <sup>-3</sup> | -                            | -                                          |
| MSP1E3D1 <i>E. coli</i> <sup>b</sup> | -           | 5.0 <sub>63</sub> ± 9.0 × 10 <sup>-3</sup> | -                            | -                                          |

Entries without values (-) indicates no quantities were obtained.  $R_s$  values of PIP<sub>2</sub>, Cardiolipin and *E. coli* Nanodiscs were obtained from the averages of other MSP1D1 and MSP1E3D1 Nanodiscs and used for the calculation of  $Z_{DHH}$  from the electrophoretic mobilities.

<sup>a</sup> Subscripted numbers are the values used in subsequent calculations, even though they are beyond the precision of the measurements

<sup>b</sup> Lipid content estimated by Avanti Polar Lipids

**Table S2**  
Solvent properties at 20 °C

| Buffer                                                | Conductivity (mS) | Viscosity (cp)     |
|-------------------------------------------------------|-------------------|--------------------|
| 100 mM NaCl, 50 mM Tris pH 7.4                        | 12.0-12.4         | 1.02 <sub>67</sub> |
| 34 mM NaCl, 17 mM Tris pH 7.4                         | 3.9 - 4.1         | 1.01 <sub>02</sub> |
| 50 mM NaCl, 25 mM Tris pH 7.4                         | 5.6 - 6.0         | 1.01 <sub>42</sub> |
| 68 mM NaCl, 34 mM Tris pH 7.4                         | 8.1 - 8.3         | 1.01 <sub>87</sub> |
| 84 mM NaCl, 42 mM Tris pH 7.4                         | 10.1 - 10.4       | 1.02 <sub>27</sub> |
| 150 mM NaCl, 75 mM Tris pH 7.4                        | 17.5 - 18.0       | 1.03 <sub>90</sub> |
| 100 mM NaCl, 50mM Tris, 3 mM CaCl <sub>2</sub> pH 7.4 | 10.0 - 10.5       | 1.02 <sub>72</sub> |
| 100 mM NaCl, 50mM Tris, 3 mM MgCl pH 7.4              | 11.8 - 12.3       | 1.02 <sub>80</sub> |
| 100 mM KCl, 50 mM Tris pH 7.4                         | 14.3 - 14.7       | 1.01 <sub>60</sub> |
| 100 mM LiCl, 50 mM Tris pH 7.4                        | 9.8 - 10.4        | 1.04 <sub>21</sub> |
| 1X PBS                                                | 13.5 - 13.8       | 1.02 <sub>00</sub> |
| 100 mM KCl, 50 mM Tris pH 7.4 <sup>a</sup>            | 12.8-13.2         | 1.10 <sub>90</sub> |
| 100 mM KCl, 50 mM Tris pH 7.4 <sup>b</sup>            | 19.8-21.1         | 0.71 <sub>90</sub> |

Solvent properties of different buffers used to determine the electrophoretic mobility and  $Z_{DHH}$  of Nanodiscs by MCE. Experiments, unless denoted, were performed at 20°C.

<sup>a</sup>Conductivity and viscosity values of standard buffer at 25°C

<sup>b</sup>Conductivity and viscosity values of standard buffer at 35°C

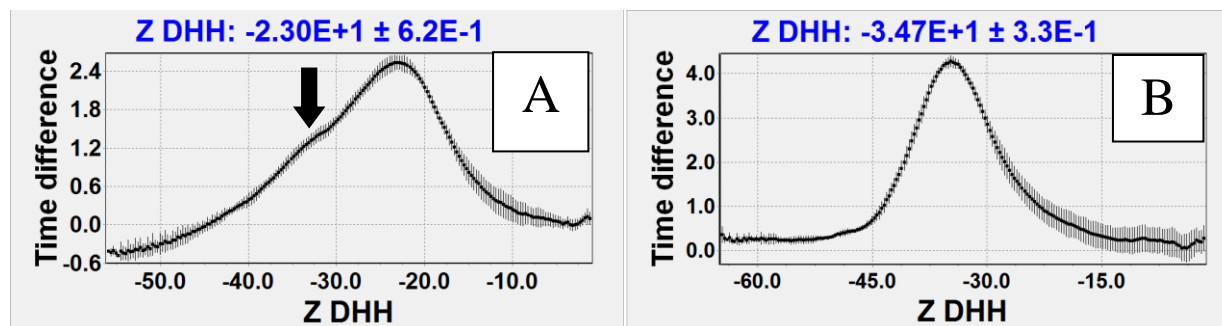

**Figures S1 (A) and S1 (B)** MCE data for MSP1D1 30POPA Nanodiscs in the presence of 3 mM Ca<sup>2+</sup> (a) and 3 mM Mg<sup>2+</sup> (b). Unlike the distribution data seen in **Figure 1B**, there is a pronounced shoulder (indicated by the arrow) in this data in accord with the aggregation characterized by sedimentation velocity. Similar  $Z_{DHH}$  distributions were also observed with 10 and 70POPA Nanodiscs in the presence of Ca<sup>2+</sup>.

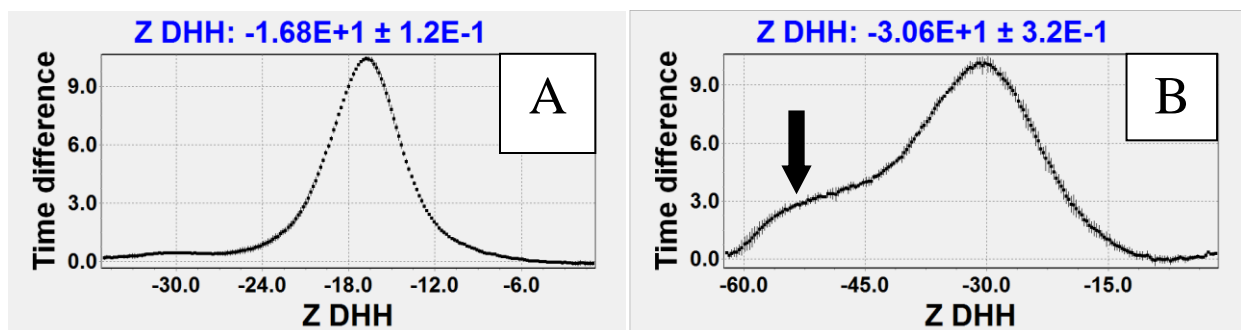

**Figure S2** MCE data for MSP1D1 10PIP<sub>2</sub> Nanodiscs in the presence of 3 mM Ca<sup>2+</sup> (A) and 3 mM Mg<sup>2+</sup> (B). Unlike the distribution data seen in **Figure 1B**, there is a pronounced shoulder (indicated by the arrow) in the presence of Mg<sup>2+</sup>. This observation is opposite to that of POPA Nanodiscs, in which POPA Nanodiscs aggregated in Ca<sup>2+</sup>, but not Mg<sup>2+</sup>.

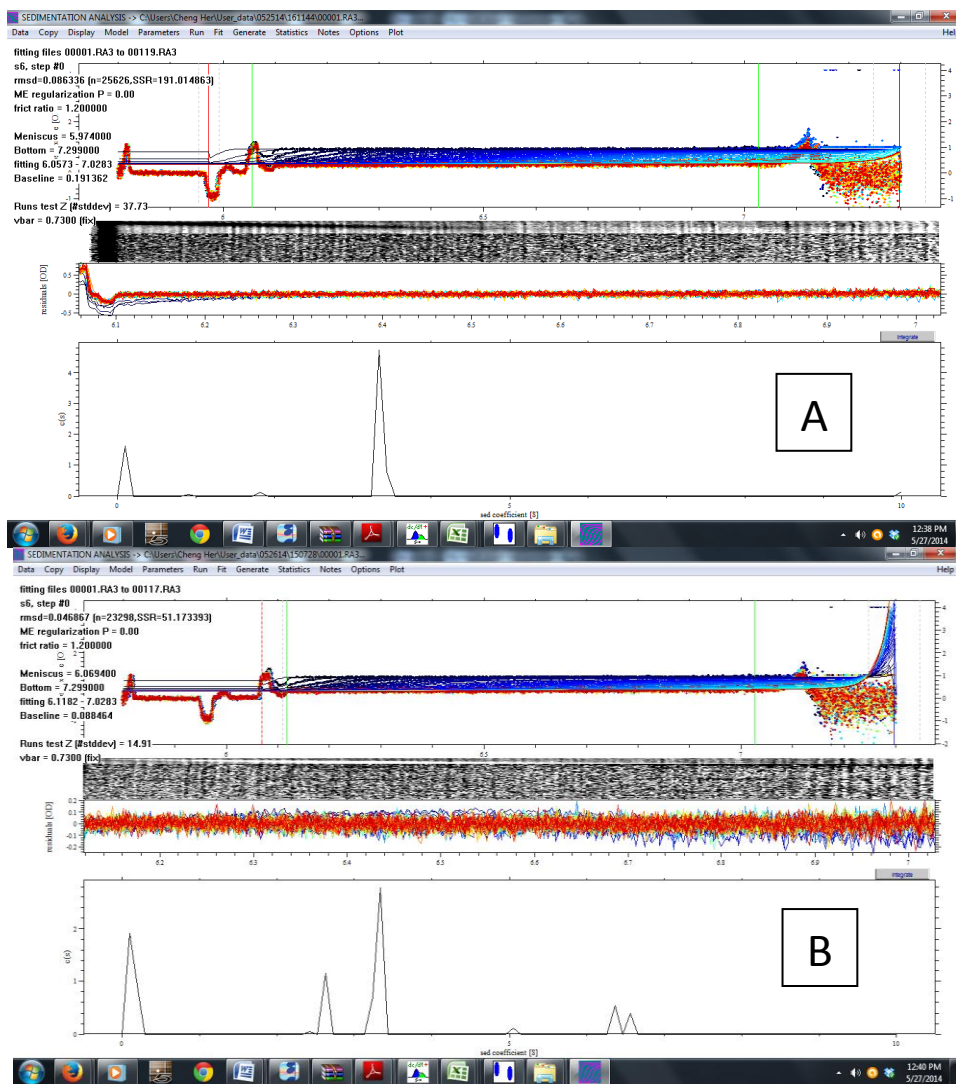

**Figure S3** Sedimentation velocity data of MSP1D1 10POPA in the absence (A) and presence (B) of Ca<sup>2+</sup>.

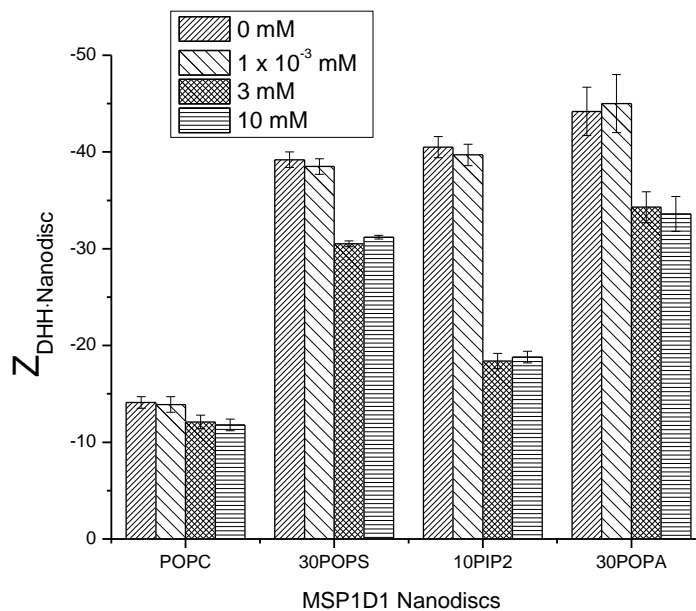

**Figure S4** The  $Z_{DHH}$  of MSP1D1 POPC Nanodiscs in at varying concentrations of  $Ca^{2+}$  (POPC, 30POPS and 10PIP2) and  $Mg^{2+}$  (30POPA).

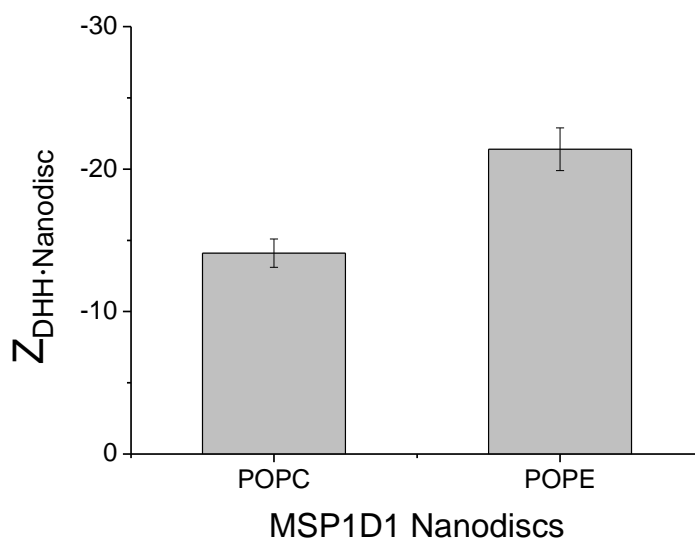

**Figure S5** Comparison of  $Z_{DHH}$  for MSP1D1 POPC and 10% POPE Nanodiscs.

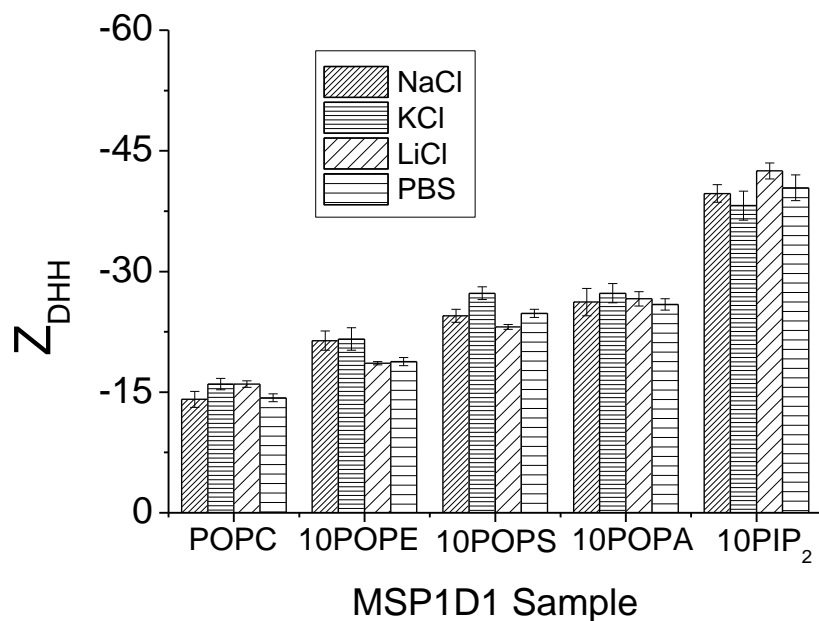

**Figure S6**  $Z_{DHH}$  of MSP1D1 Nanodiscs in the presence of different monovalent alkali cations.

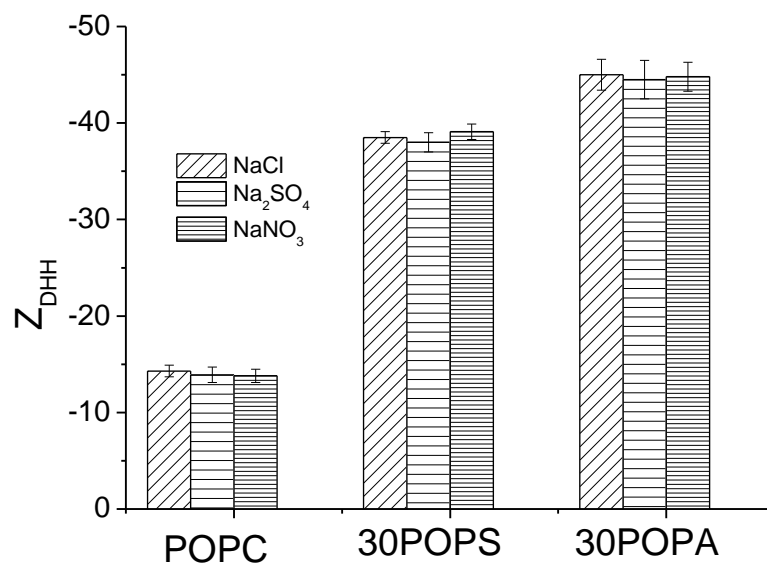

**Figure S7**  $Z_{DHH}$  of MSP1D1 POPC, MSP1D1 30POPS and MSP1D1 30POPA Nanodiscs in the presence of anions.

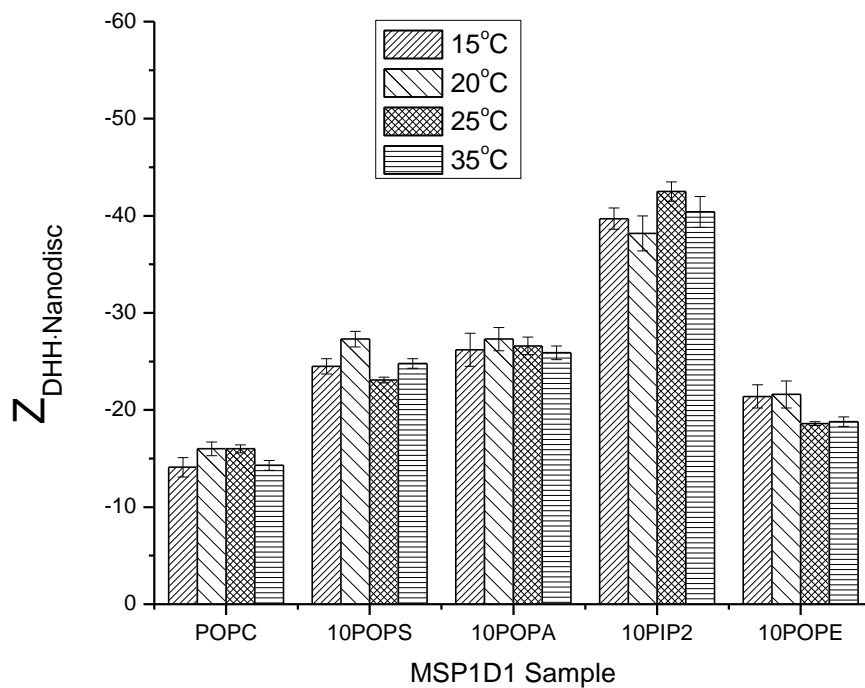

**Figure S8** Temperature dependence of  $Z_{DHH}$  for POPC, POPS, POPA, PIP<sub>2</sub> and POPE Nanodiscs.

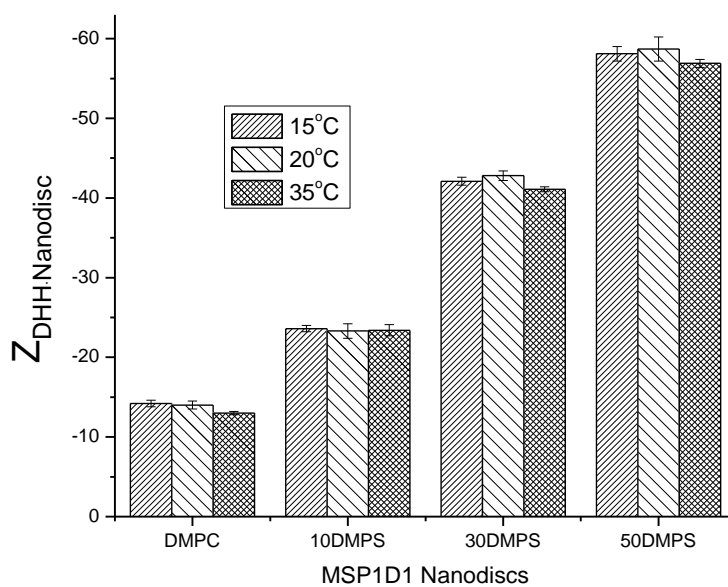

**Figure S9** Temperature dependence of  $Z_{DHH}$  for DMPC and DMPS Nanodiscs.



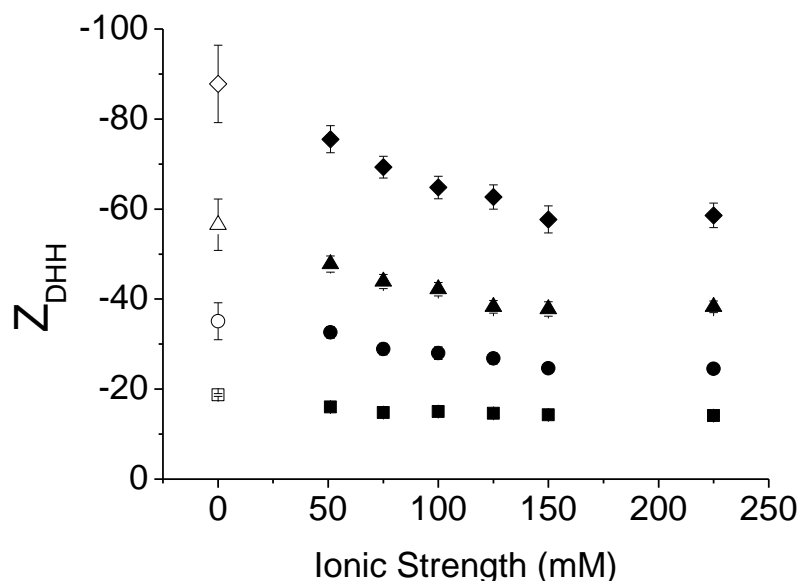

**Figure S10**  $Z_{\text{DHH}}$  as a function of  $\text{Na}^+$  concentration for MSP1D1 POPC (■), 10POPS (●), 30POPS (▲) and 70POPS (◆) Nanodiscs. In this figure, the closed data points are the experimental  $Z_{\text{DHH}}$  values and the open data points are the extrapolated intercept value at zero salt. The data were fit to a 3<sup>rd</sup> order polynomial in order to generate the extrapolated value at zero salt. The 3<sup>rd</sup> order provided a significantly better fit (F-test) than a 2<sup>nd</sup> order polynomial, whereas a 4<sup>th</sup> order fit provided no improvement over the 3<sup>rd</sup> order and yielded ill-determined coefficients. Similar observations were made for POPA and PIP<sub>2</sub> Nanodiscs.

**Table S3**  
 $Z_{\text{DHH}}$  extrapolated to zero salt

| Nanodisc           | $Z_{\text{DHH-Nanodisc}}$ at zero salt | $Z_{\text{calculated}}^{\text{a}}$ |
|--------------------|----------------------------------------|------------------------------------|
| POPC               | $-18.7 \pm 0.3$                        | -16                                |
| 10POPE             | $-32.7 \pm 2.7$                        | -29                                |
| 10POPS             | $-35.1 \pm 4.1$                        | -29                                |
| 30POPS             | $-56.5 \pm 5.7$                        | -54                                |
| 70POPS             | $-87.8 \pm 8.6$                        | -104                               |
| 10POPA             | $-35.9 \pm 4.8$                        | -32                                |
| 30POPA             | $-69.8 \pm 2.0$                        | -63                                |
| 70POPA             | $-83.5 \pm 5.0$                        | -125                               |
| 10PIP <sub>2</sub> | $-52.6 \pm 2.0$                        | -54                                |

<sup>a</sup> Charge calculated includes the charge calculated for two MSP1D1 MSPs ( $Z_{\text{DHH}} = -16$ ).

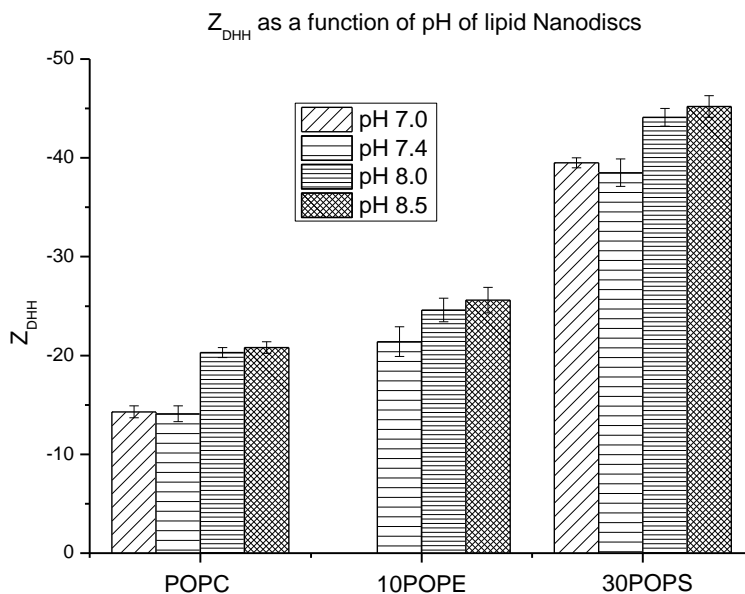

**Figure S11** pH dependence of  $Z_{DHH}$  for MSP1D1 POPC, MSP1D1 10POPE and MSP1D1 30POPS Nanodiscs. Electrophoretic mobility measurements on 10POPE Nanodiscs at pH 7.0 could not be made. The reason for this is unclear, as sedimentation velocity data on 10POPE Nanodiscs at pH 7.0 show a monodisperse size population. Please note therefore, that in this figure, 10POPE Nanodiscs do not have a  $Z_{DHH}$  plotted at pH 7.0.

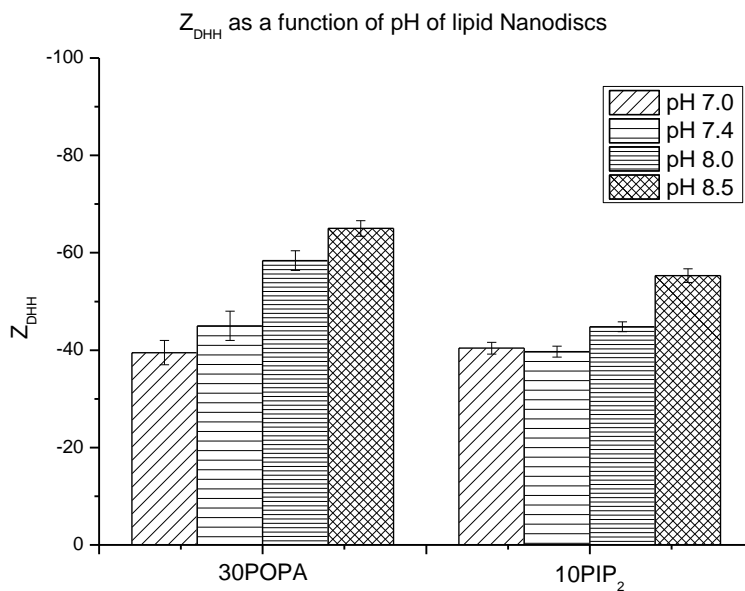

**Figure S12** pH dependence of  $Z_{DHH}$  for MSP1D1 30POPA and MSP1D1 10PIP<sub>2</sub> Nanodiscs.

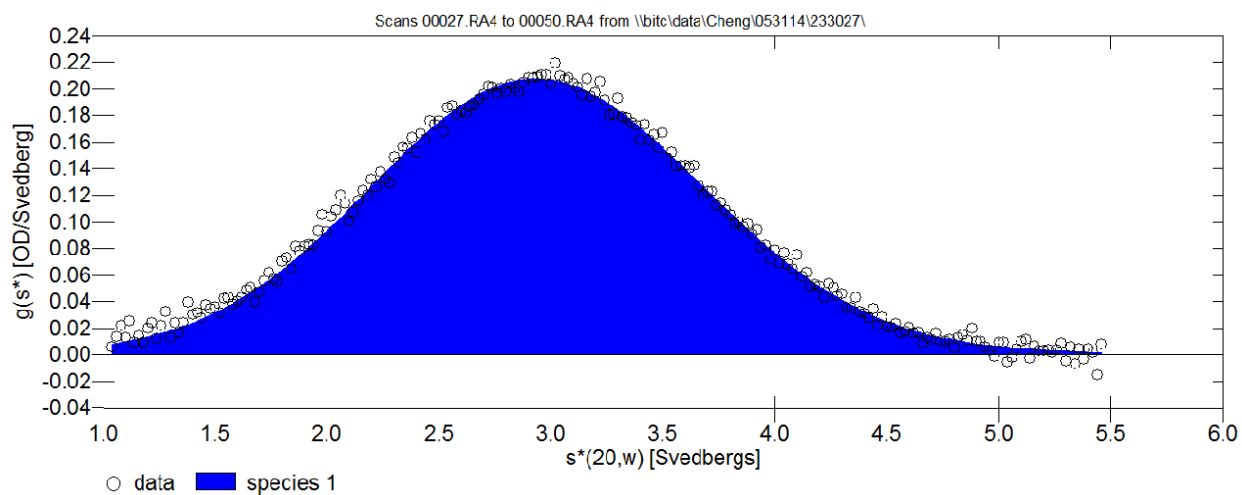

**Figure S13** Sedimentation velocity data of 10POPE Nanodiscs in standard buffer at pH 7.4 using DC/DT+ [Philo, 2000].

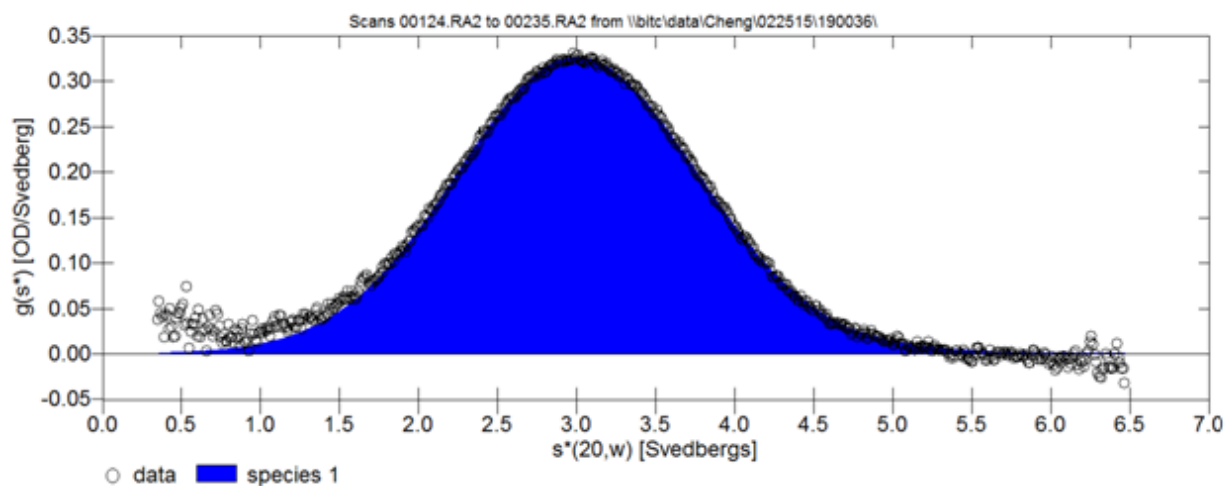

**Figure S14** Sedimentation velocity data of 10POPE Nanodiscs in standard buffer at pH 7.0 using DC/DT+ [Philo, 2000].
